# Supplementary material
Source: HighWire-hosted journal article supplement (https://www.rsfjournal.org/content/suppl/2023/08/07/9.4.32)

**Rauscher and Burns**

**Online Appendix**

Table A1: Medicaid Policy Changes Implemented to Facilitate Access – by State

| State                | Removed Asset Test | Continuous Eligibility | Coordinated Care Services | Presumed Eligibility | Shortened Application Form | Home Visits | Officials at Care Sites | Expedited Applications | Transportation Costs | Total Number Adopted |
|----------------------|--------------------|------------------------|---------------------------|----------------------|----------------------------|-------------|-------------------------|------------------------|----------------------|----------------------|
| Alabama              | 1                  | 1                      | 1                         | 1                    | 1                          | 1           | 1                       | 0                      | 0                    | 7                    |
| Alaska               | 1                  | 1                      | 1                         | 0                    | 0                          | 1           | 0                       | 1                      | 0                    | 5                    |
| Arizona              | 1                  | 1                      | 0                         | 0                    | 0                          | 0           | 0                       | 0                      | 0                    | 2                    |
| Arkansas             | 1                  | 1                      | 1                         | 1                    | 0                          | 1           | 1                       | 0                      | 0                    | 6                    |
| California           | 0                  | 0                      | 1                         | 0                    | 0                          | 1           | 1                       | 0                      | 0                    | 3                    |
| Colorado             | 1                  | 1                      | 0                         | 1                    | 1                          | 0           | 0                       | 0                      | 0                    | 4                    |
| Connecticut          | 1                  | 1                      | 0                         | 1                    | 0                          | 1           | 0                       | 0                      | 0                    | 4                    |
| Delaware             | 1                  | 1                      | 1                         | 0                    | 1                          | 1           | 1                       | 1                      | 0                    | 7                    |
| District of Columbia | 1                  | 1                      | 0                         | 1                    | 0                          | 0           | 0                       | 0                      | 0                    | 3                    |
| Florida              | 1                  | 1                      | 0                         | 1                    | 1                          | 0           | 1                       | 0                      | 0                    | 5                    |
| Georgia              | 1                  | 1                      | 1                         | 0                    | 1                          | 0           | 0                       | 1                      | 0                    | 5                    |
| Hawaii               | 1                  | 1                      | 1                         | 1                    | 0                          | 0           | 0                       | 0                      | 0                    | 4                    |
| Idaho                | 1                  | 1                      | 1                         | 1                    | 0                          | 1           | 0                       | 0                      | 0                    | 5                    |
| Illinois             | 0                  | 1                      | 1                         | 1                    | 0                          | 0           | 0                       | 0                      | 0                    | 3                    |
| Indiana              | 1                  | 1                      | 1                         | 1                    | 0                          | 0           | 0                       | 0                      | 0                    | 4                    |
| Iowa                 | 0                  | 1                      | 1                         | 1                    | 0                          | 0           | 0                       | 0                      | 0                    | 3                    |
| Kansas               | 1                  | 0                      | 0                         | 0                    | 0                          | 1           | 0                       | 1                      | 0                    | 3                    |
| Kentucky             | 1                  | 1                      | 0                         | 0                    | 1                          | 0           | 1                       | 0                      | 0                    | 4                    |
| Louisiana            | 1                  | 1                      | 1                         | 1                    | 1                          | 0           | 1                       | 0                      | 0                    | 6                    |
| Maine                | 1                  | 1                      | 0                         | 1                    | 0                          | 0           | 0                       | 0                      | 0                    | 3                    |
| Maryland             | 1                  | 1                      | 1                         | 1                    | 1                          | 1           | 0                       | 0                      | 0                    | 6                    |
| Massachusetts        | 1                  | 1                      | 1                         | 1                    | 1                          | 0           | 0                       | 0                      | 0                    | 5                    |
| Michigan             | 1                  | 1                      | 1                         | 0                    | 1                          | 1           | 0                       | 0                      | 1                    | 6                    |
| Minnesota            | 1                  | 1                      | 1                         | 0                    | 1                          | 1           | 0                       | 1                      | 0                    | 6                    |

|                  |    |    |    |    |    |    |    |    |   |           |
|------------------|----|----|----|----|----|----|----|----|---|-----------|
| Mississippi      | 1  | 1  | 1  | 0  | 0  | 1  | 1  | 0  | 1 | 6         |
| Missouri         | 1  | 1  | 1  | 1  | 1  | 0  | 1  | 0  | 0 | 6         |
| Montana          | 1  | 0  | 0  | 1  | 0  | 0  | 0  | 0  | 0 | 2         |
| Nebraska         | 1  | 1  | 0  | 1  | 0  | 0  | 0  | 0  | 0 | 3         |
| Nevada           | 1  | 0  | 0  | 0  | 0  | 0  | 0  | 0  | 0 | 1         |
| New Hampshire    | 1  | 0  | 1  | 0  | 0  | 1  | 1  | 0  | 0 | 4         |
| New Jersey       | 1  | 1  | 1  | 1  | 1  | 1  | 0  | 0  | 0 | 6         |
| New Mexico       | 1  | 1  | 1  | 1  | 1  | 0  | 0  | 0  | 0 | 5         |
| New York         | 1  | 1  | 1  | 1  | 0  | 1  | 0  | 0  | 0 | 5         |
| North Carolina   | 1  | 1  | 1  | 1  | 1  | 1  | 1  | 0  | 0 | 7         |
| North Dakota     | 0  | 0  | 0  | 0  | 0  | 0  | 0  | 0  | 0 | 0         |
| Ohio             | 1  | 1  | 1  | 0  | 1  | 1  | 1  | 0  | 0 | 6         |
| Oklahoma         | 1  | 1  | 0  | 0  | 0  | 0  | 0  | 0  | 0 | 2         |
| Oregon           | 1  | 1  | 1  | 0  | 1  | 1  | 0  | 1  | 0 | 6         |
| Pennsylvania     | 1  | 0  | 1  | 1  | 0  | 1  | 0  | 0  | 0 | 4         |
| Rhode Island     | 1  | 0  | 0  | 0  | 0  | 0  | 0  | 0  | 0 | 1         |
| South Carolina   | 1  | 1  | 1  | 0  | 1  | 0  | 1  | 0  | 0 | 5         |
| South Dakota     | 1  | 1  | 0  | 0  | 1  | 0  | 0  | 0  | 0 | 3         |
| Tennessee        | 1  | 1  | 1  | 1  | 0  | 1  | 1  | 0  | 0 | 6         |
| Texas            | 0  | 1  | 0  | 1  | 1  | 0  | 1  | 0  | 0 | 4         |
| Utah             | 1  | 1  | 1  | 1  | 0  | 1  | 1  | 0  | 0 | 6         |
| Vermont          | 1  | 1  | 1  | 0  | 1  | 1  | 1  | 0  | 1 | 7         |
| Virginia         | 1  | 1  | 1  | 0  | 1  | 1  | 1  | 1  | 0 | 7         |
| Washington       | 1  | 1  | 1  | 0  | 1  | 1  | 0  | 1  | 1 | 7         |
| West Virginia    | 1  | 1  | 1  | 0  | 1  | 0  | 1  | 1  | 0 | 6         |
| Wisconsin        | 1  | 1  | 0  | 1  | 1  | 0  | 0  | 1  | 0 | 5         |
| Wyoming          | 1  | 1  | 0  | 1  | 0  | 0  | 0  | 1  | 0 | 4         |
| Number of States | 46 | 43 | 33 | 28 | 25 | 24 | 19 | 11 | 4 | Mean=4.57 |

Compiled from Hill 1990.

Table A2: Descriptive Statistics  
Panel A: NVSS Birth Data

| <b>Variable</b>                     | <b>Mean</b> | <b>Std. Dev.</b> | <b>Pre-Expansion</b> | <b>Post-Expansion</b> |
|-------------------------------------|-------------|------------------|----------------------|-----------------------|
| Birth Weight (grams)                | 3369.09     | 577.12           | 3372.61              | 3367.29               |
| Gestational Length (weeks)          | 39.25       | 2.65             | 39.37                | 39.20                 |
| % Low Birth Weight                  | 5.75        | 23.28            | 5.71                 | 5.77                  |
| % Preterm Birth                     | 9.43        | 29.22            | 9.12                 | 9.58                  |
| % Intrauterine Growth Restriction   | 10.75       | 30.98            | 11.05                | 10.60                 |
| % Any Prenatal Care                 | 98.37       | 12.67            | 98.50                | 98.30                 |
| % 1st Trimester Care                | 76.95       | 42.12            | 77.24                | 76.80                 |
| Prenatal Visits                     | 11.00       | 4.06             | 10.90                | 11.06                 |
| Prenatal Care Length                | 7.14        | 1.80             | 7.13                 | 7.14                  |
| % Born Post Expansion               | 66.21       | 47.30            | 0.00                 | 100.00                |
| % Removed Asset Test                | 77.01       | 42.08            | 88.19                | 71.30                 |
| % Shortened App Form                | 52.34       | 49.95            | 52.89                | 52.07                 |
| % Officials at Care Sites           | 46.96       | 49.91            | 38.01                | 51.53                 |
| % Continuous Eligibility            | 80.99       | 39.24            | 87.34                | 77.75                 |
| % Expedited Applications            | 13.71       | 34.40            | 15.95                | 12.57                 |
| % Coordinated Care Services         | 76.01       | 42.71            | 78.31                | 74.83                 |
| % Presumptive Eligibility           | 59.12       | 49.16            | 62.32                | 57.48                 |
| % Home Care Visits                  | 55.81       | 49.66            | 54.78                | 56.34                 |
| % Transportation Costs              | 5.51        | 22.81            | 5.79                 | 5.36                  |
| % 5 Reforms to Ease Medicaid Access | 3.62        | 18.68            | 4.10                 | 3.38                  |
| % 3 Reforms to Ease Care Access     | 25.33       | 43.49            | 29.08                | 23.42                 |
| Birth Month from Expansion Date     | 13.42       | 29.36            | -20.99               | 30.98                 |
| Birth Year                          | 1989.23     | 2.53             | 1986.37              | 1990.69               |
| % Male Infant                       | 51.20       | 49.99            | 51.18                | 51.21                 |
| <b>Maternal Characteristics</b>     |             |                  |                      |                       |
| % <HS                               | 22.33       | 41.65            | 20.26                | 23.39                 |
| % HS                                | 39.10       | 48.80            | 41.76                | 37.74                 |
| % Some College                      | 20.69       | 40.51            | 20.68                | 20.69                 |
| % BA                                | 17.88       | 38.32            | 17.30                | 18.18                 |
| % White                             | 68.00       | 46.65            | 73.94                | 64.97                 |
| % Black                             | 16.37       | 37.00            | 16.72                | 16.18                 |
| % American Indian                   | 0.91        | 9.48             | 0.95                 | 0.88                  |
| % Asian                             | 2.98        | 17.00            | 2.28                 | 3.33                  |
| % Latina                            | 11.75       | 32.20            | 6.10                 | 14.63                 |
| Maternal Age                        | 26.28       | 5.69             | 26.03                | 26.41                 |
| <b>State Controls</b>               |             |                  |                      |                       |
| Poverty Rate                        | 13.94       | 3.62             | 13.46                | 14.19                 |
| Unemployment Rate                   | 6.50        | 1.69             | 6.62                 | 6.44                  |
| AFDC Benefit for Family of 4        | 457.95      | 182.87           | 420.21               | 477.21                |
| % Democrat Governor                 | 53.22       | 49.90            | 62.63                | 48.41                 |

|                        |           |         |         |           |
|------------------------|-----------|---------|---------|-----------|
| % Black Residents      | 12.48     | 8.86    | 12.74   | 12.34     |
| % Latinx Residents     | 7.95      | 9.39    | 4.94    | 9.49      |
| Population (thousands) | 10490.01  | 8685.81 | 8100.23 | 11709.48  |
| Number of Births       | 2,777,872 |         | 938,573 | 1,839,299 |

NVSS birth data 1985-1994: 10% annual random sample of singleton births with infant health, prenatal care, and maternal education and race information, limited to births within 60 months of Medicaid expansion in maternal state of residence. Annual state characteristics from Census Bureau, University of Kentucky Poverty Center's State Welfare database, and Current Population Survey.

Panel B: Medicaid Data

| Variable                                       | Mean    | Std. Dev. | Pre-Expansion | Post-Expansion |
|------------------------------------------------|---------|-----------|---------------|----------------|
| <b>Medicaid</b>                                |         |           |               |                |
| Cash Transfer Recipients/Population in Poverty | 0.74    | 0.28      | 0.63          | 0.82           |
| Recipients/Population                          | 0.10    | 0.03      | 0.08          | 0.11           |
| Payments for Cash Transfer                     |         |           |               |                |
| Recipients/Population in Poverty (1995 \$)     | 2445.30 | 1485.21   | 1918.21       | 2792.07        |
| Payments/Population (1995 \$)                  | 299.12  | 154.20    | 225.43        | 347.60         |
| 5 Reforms to Ease Medicaid Access              | 0.06    | 0.24      | 0.06          | 0.06           |
| 3 Reforms to Ease Care Access                  | 0.20    | 0.40      | 0.20          | 0.20           |
| Born Post Expansion                            | 0.60    | 0.49      | 0.00          | 1.00           |
| Year from Expansion                            | 1.52    | 2.99      | -1.59         | 3.57           |
| Year                                           | 1989.52 | 2.88      | 1986.59       | 1991.46        |
| <b>State Controls</b>                          |         |           |               |                |
| Population in Poverty (thousands)              | 680.17  | 823.95    | 661.63        | 692.37         |
| Population (thousands)                         | 4885.50 | 5410.34   | 4906.27       | 4871.83        |
| Poverty Rate                                   | 13.53   | 4.28      | 13.38         | 13.64          |
| Unemployment Rate                              | 6.15    | 1.80      | 6.38          | 5.99           |
| AFDC Benefit for Family of 4                   | 443.31  | 166.60    | 426.32        | 454.48         |
| % Democrat Governor                            | 0.59    | 0.49      | 0.62          | 0.57           |
| % Black Residents                              | 11.03   | 12.60     | 10.27         | 11.54          |
| % Latinx Residents                             | 4.52    | 7.10      | 4.36          | 4.63           |
| State-Year Observations                        | 504     |           | 200           | 304            |

MSIS data 1985-1994. Annual state characteristics from Census Bureau, University of Kentucky Poverty Center's State Welfare database, and Current Population Survey.

Table A3: Coefficients for Medicaid Expansion and Reform Combinations by Race and Education – Predicting Maternal Health Behaviors During Pregnancy

| VARIABLES                          | (1)                 | (2)                | (3)                 | (4)                 | (5)                 |
|------------------------------------|---------------------|--------------------|---------------------|---------------------|---------------------|
|                                    | Black               | Latina             | White               | No College          | College             |
| Tobacco Use                        |                     |                    |                     |                     |                     |
| Post Expansion                     | -0.071**<br>(0.018) | -0.064<br>(0.237)  | -0.019**<br>(0.006) | 0.001<br>(0.016)    | -0.011**<br>(0.004) |
| Post * Medicaid Access Combination | -0.356**<br>(0.016) | 0.051<br>(0.238)   | -0.038**<br>(0.005) | -0.071**<br>(0.007) | 0.011**<br>(0.004)  |
| Post * Care Access Combination     | -0.422**<br>(0.016) | -0.135<br>(0.132)  | -0.029**<br>(0.007) | -0.016<br>(0.012)   | -0.026*<br>(0.010)  |
| Alcohol Use                        |                     |                    |                     |                     |                     |
| Post Expansion                     | -0.186**<br>(0.026) | -0.129<br>(0.122)  | -0.032**<br>(0.002) | -0.063**<br>(0.007) | -0.019**<br>(0.005) |
| Post * Medicaid Access Combination | -0.169**<br>(0.052) | -0.147<br>(0.122)  | -0.003<br>(0.006)   | -0.017**<br>(0.004) | 0.000<br>(0.011)    |
| Post * Care Access Combination     | 0.006<br>(0.035)    | 0.122+<br>(0.066)  | 0.002<br>(0.009)    | -0.014*<br>(0.006)  | 0.039**<br>(0.014)  |
| Daily Cigarettes                   |                     |                    |                     |                     |                     |
| Post Expansion                     | 0.362<br>(0.448)    | -1.536<br>(3.144)  | -0.187<br>(0.183)   | -0.080<br>(0.267)   | 0.055<br>(0.065)    |
| Post * Medicaid Access Combination | -3.428**<br>(0.740) | -1.847<br>(3.173)  | 0.379**<br>(0.089)  | 0.091<br>(0.088)    | 0.479**<br>(0.043)  |
| Post * Care Access Combination     | -2.494**<br>(0.469) | -2.090<br>(1.613)  | -0.379*<br>(0.160)  | 0.066<br>(0.265)    | -0.281*<br>(0.121)  |
| Weekly Alcoholic Drinks            |                     |                    |                     |                     |                     |
| Post Expansion                     | -0.319<br>(0.207)   | -0.016<br>(0.025)  | -0.027**<br>(0.006) | -0.082**<br>(0.009) | 0.001<br>(0.007)    |
| Post * Medicaid Access Combination | -0.751*<br>(0.324)  | -0.128*<br>(0.060) | 0.025*<br>(0.010)   | -0.025*<br>(0.010)  | 0.119**<br>(0.012)  |
| Post * Care Access Combination     | -0.261<br>(0.200)   | -0.090*<br>(0.037) | -0.059**<br>(0.014) | -0.199**<br>(0.014) | 0.075**<br>(0.022)  |
| Weight Gain                        |                     |                    |                     |                     |                     |
| Post Expansion                     | -3.475<br>(6.023)   | 2.895<br>(3.531)   | -1.074**<br>(0.226) | -1.401+<br>(0.757)  | -0.441**<br>(0.124) |
| Post * Medicaid Access Combination | 14.205<br>(9.924)   | 8.668*<br>(3.542)  | 0.182<br>(0.203)    | -0.625<br>(0.385)   | 1.574**<br>(0.111)  |
| Post * Care Access Combination     | 0.102<br>(5.654)    | -3.492+<br>(1.913) | -2.256**<br>(0.378) | -3.164**<br>(0.836) | -1.358**<br>(0.130) |

NVSS birth data 1988-1994: 10% annual random sample of singleton births with infant health, prenatal care, and maternal education and race information, limited to births within 48 months of Medicaid expansion in maternal state of residence. Coefficients are from models controlling for maternal age, infant sex, state unemployment rate, poverty rate, AFDC benefit for a family of 4, an indicator for Democrat governor, percent Black, percent Latinx, (log) population, individual reforms, and state and year fixed effects. Coefficients are from separate models by maternal race/ethnicity (models 1-3) and education (models 4-5).

Estimates use an alternative combination of Medicaid access reforms including 4 reforms (shortened applications, expedited applications, officials at care sites, and continuous eligibility) due to the shorter time range in the dependent variables.

Robust standard errors in parentheses. \*\* p<0.01, \* p<0.05, + p<0.1

Shaded coefficients indicate significant differences between coefficients by race (Black-White), ethnicity (Latina-White), or education (no college-college) (p<0.05; Clogg et al. 1995).

Table A4: Coefficients for Medicaid Expansion and Reform Combinations by State Physicians per Capita

Panel A: Predicting Infant Health

| VARIABLES                         | (1)<br>Birth Weight  | (2)<br>Gestational Length | (3)<br>Low Birth Weight | (4)<br>Preterm Birth |
|-----------------------------------|----------------------|---------------------------|-------------------------|----------------------|
| <u>Low Physicians per Capita</u>  |                      |                           |                         |                      |
| Post Expansion                    | 30.506**<br>(9.032)  | 0.106*<br>(0.046)         | -0.010+<br>(0.005)      | -0.009<br>(0.006)    |
| Post*Medicaid Access Combo        | 6.943<br>(4.190)     | 0.018<br>(0.040)          | -0.001<br>(0.003)       | -0.006+<br>(0.003)   |
| Post*Care Access Combo            | -6.293<br>(8.927)    | -0.084+<br>(0.045)        | -0.001<br>(0.004)       | 0.006<br>(0.005)     |
| <u>High Physicians per Capita</u> |                      |                           |                         |                      |
| Post Expansion                    | 32.524*<br>(14.042)  | 0.229**<br>(0.054)        | -0.011**<br>(0.002)     | -0.018**<br>(0.002)  |
| Post*Medicaid Access Combo        | 8.399<br>(6.886)     | 0.067+<br>(0.035)         | -0.003<br>(0.002)       | -0.006<br>(0.003)    |
| Post*Care Access Combo            | 44.558**<br>(10.077) | 0.197**<br>(0.032)        | -0.012**<br>(0.002)     | -0.010**<br>(0.003)  |

Panel B: Predicting Prenatal Care

| VARIABLES                         | (1)<br>Any Prenatal Care | (2)<br>1 <sup>st</sup> Trimester Care | (3)<br>Prenatal Visits | (4)<br>Prenatal Care Length |
|-----------------------------------|--------------------------|---------------------------------------|------------------------|-----------------------------|
| <u>Low Physicians per Capita</u>  |                          |                                       |                        |                             |
| Post Expansion                    | 0.005<br>(0.003)         | -0.018*<br>(0.008)                    | 0.012<br>(0.109)       | -0.074+<br>(0.043)          |
| Post*Medicaid Access Combo        | -0.004+<br>(0.002)       | -0.015+<br>(0.008)                    | -0.240+<br>(0.121)     | -0.090+<br>(0.047)          |
| Post*Care Access Combo            | 0.004<br>(0.003)         | 0.004<br>(0.010)                      | -0.237+<br>(0.136)     | 0.045<br>(0.053)            |
| <u>High Physicians per Capita</u> |                          |                                       |                        |                             |
| Post Expansion                    | 0.007<br>(0.007)         | 0.007<br>(0.021)                      | 0.260<br>(0.152)       | 0.001<br>(0.142)            |
| Post*Medicaid Access Combo        | -0.012**<br>(0.004)      | -0.012<br>(0.012)                     | -0.097<br>(0.130)      | -0.147*<br>(0.065)          |
| Post*Care Access Combo            | 0.021**<br>(0.007)       | 0.040*<br>(0.016)                     | 0.529**<br>(0.100)     | 0.260*<br>(0.107)           |

NVSS birth data 1985-1994: 10% annual random sample of singleton births with infant health, prenatal care, and maternal education and race information, limited to births within 48 months of Medicaid expansion in maternal state of residence. Samples are limited to states below and above the 1991 median level of physicians per capita (2 physicians per 1,000 residents; using data from Johnson 2002:89). Coefficients are from models controlling for maternal age, infant sex, state unemployment rate, poverty rate, AFDC benefit for a family of 4, an indicator for Democrat governor, percent Black, percent Latinx, (log) population, individual reforms, and state and year fixed effects.

Robust standard errors in parentheses. \*\* p<0.01, \* p<0.05, + p<0.1

Shaded coefficients indicate significant differences between coefficients above and below median state physicians per capita (p<0.05; Clogg et al. 1995).

Table A5: Coefficients for Medicaid Expansion and Reform Combinations by Race and Education by State Physicians per Capita  
Panel A: Predicting Infant Health

| VARIABLES                          | (1)                  | (2)                   | (3)                  | (4)                  | (5)                  |
|------------------------------------|----------------------|-----------------------|----------------------|----------------------|----------------------|
|                                    | Black                | Latina                | White                | No College           | College              |
| <b>Birth Weight</b>                |                      |                       |                      |                      |                      |
| <b>Low Physicians per Capita</b>   |                      |                       |                      |                      |                      |
| Post Expansion                     | 58.653<br>(40.185)   | -5.922<br>(30.048)    | 34.038**<br>(10.380) | 29.848*<br>(12.416)  | 19.625+<br>(9.743)   |
| Post * Medicaid Access Combination | -9.445<br>(12.517)   | .                     | -2.804<br>(4.421)    | 17.030*<br>(6.493)   | -7.598<br>(6.320)    |
| Post * Care Access Combination     | -23.439<br>(21.725)  | -41.360<br>(44.142)   | -13.362<br>(9.958)   | 5.977<br>(11.904)    | -26.035*<br>(11.577) |
| <b>High Physicians per Capita</b>  |                      |                       |                      |                      |                      |
| Post Expansion                     | 15.604<br>(18.387)   | 91.352**<br>(26.980)  | 6.699<br>(8.783)     | 45.422**<br>(12.089) | 19.119<br>(19.061)   |
| Post * Medicaid Access Combination | -49.385*<br>(18.851) | 188.000**<br>(17.811) | 20.785**<br>(3.723)  | 13.330<br>(9.989)    | -2.254<br>(6.500)    |
| Post * Care Access Combination     | 41.305**<br>(10.032) | 59.818**<br>(16.004)  | 15.555*<br>(6.396)   | 68.812**<br>(8.303)  | 17.395<br>(13.913)   |
| <b>Low Birth Weight</b>            |                      |                       |                      |                      |                      |
| <b>Low Physicians per Capita</b>   |                      |                       |                      |                      |                      |
| Post Expansion                     | -0.015<br>(0.018)    | 0.011<br>(0.013)      | -0.010*<br>(0.004)   | -0.010+<br>(0.005)   | -0.006<br>(0.006)    |
| Post * Medicaid Access Combination | -0.030**<br>(0.005)  | .                     | 0.003<br>(0.003)     | -0.007+<br>(0.004)   | 0.011**<br>(0.003)   |
| Post * Care Access Combination     | 0.029*<br>(0.011)    | -0.018<br>(0.034)     | -0.001<br>(0.004)    | -0.005<br>(0.005)    | 0.006<br>(0.004)     |
| <b>High Physicians per Capita</b>  |                      |                       |                      |                      |                      |
| Post Expansion                     | -0.022<br>(0.021)    | -0.025*<br>(0.009)    | -0.004*<br>(0.002)   | -0.013**<br>(0.003)  | -0.008**<br>(0.002)  |
| Post * Medicaid Access Combination | 0.005<br>(0.013)     | -0.092**<br>(0.006)   | -0.006**<br>(0.001)  | -0.001<br>(0.004)    | -0.004+<br>(0.002)   |
| Post * Care Access Combination     | -0.019+<br>(0.011)   | -0.008<br>(0.006)     | -0.005**<br>(0.001)  | -0.018**<br>(0.003)  | -0.005**<br>(0.002)  |

Panel B: Predicting Prenatal Care

| VARIABLES                          | (1)                | (2)                | (3)                 | (4)                 | (5)                |
|------------------------------------|--------------------|--------------------|---------------------|---------------------|--------------------|
|                                    | Black              | Latina             | White               | No College          | College            |
| <u>Any Prenatal Care</u>           |                    |                    |                     |                     |                    |
| <u>Low Physicians per Capita</u>   |                    |                    |                     |                     |                    |
| Post Expansion                     | 0.032+<br>(0.018)  | 0.012<br>(0.015)   | 0.004+<br>(0.002)   | 0.006<br>(0.005)    | 0.004+<br>(0.002)  |
| Post * Medicaid Access Combination | -0.014+<br>(0.007) | .                  | -0.008**<br>(0.001) | -0.006+<br>(0.003)  | -0.001<br>(0.001)  |
| Post * Care Access Combination     | 0.014<br>(0.012)   | -0.003<br>(0.018)  | 0.004+<br>(0.002)   | 0.004<br>(0.004)    | 0.002<br>(0.002)   |
| <u>High Physicians per Capita</u>  |                    |                    |                     |                     |                    |
| Post Expansion                     | -0.016<br>(0.028)  | 0.219**<br>(0.025) | 0.001<br>(0.002)    | 0.008<br>(0.010)    | 0.002<br>(0.002)   |
| Post * Medicaid Access Combination | -0.052*<br>(0.022) | 0.122**<br>(0.030) | -0.003<br>(0.002)   | -0.020**<br>(0.007) | -0.002*<br>(0.001) |
| Post * Care Access Combination     | 0.053**<br>(0.011) | 0.144**<br>(0.016) | 0.005*<br>(0.002)   | 0.029**<br>(0.010)  | 0.006**<br>(0.002) |
| <u>Prenatal Visits</u>             |                    |                    |                     |                     |                    |
| <u>Low Physicians per Capita</u>   |                    |                    |                     |                     |                    |
| Post Expansion                     | 0.712<br>(0.533)   | -0.272<br>(0.407)  | 0.109<br>(0.096)    | -0.070<br>(0.124)   | 0.188<br>(0.154)   |
| Post * Medicaid Access Combination | -0.369+<br>(0.215) | .                  | -0.304*<br>(0.137)  | -0.310*<br>(0.135)  | -0.027<br>(0.120)  |
| Post * Care Access Combination     | -0.495<br>(0.345)  | -1.181*<br>(0.492) | -0.046<br>(0.163)   | -0.282+<br>(0.145)  | -0.151<br>(0.169)  |
| <u>High Physicians per Capita</u>  |                    |                    |                     |                     |                    |
| Post Expansion                     | -0.237<br>(0.702)  | 2.548**<br>(0.456) | 0.220*<br>(0.081)   | 0.313<br>(0.214)    | 0.250*<br>(0.096)  |
| Post * Medicaid Access Combination | -0.411<br>(0.433)  | -0.054<br>(0.504)  | 0.123<br>(0.113)    | -0.215<br>(0.165)   | 0.039<br>(0.099)   |
| Post * Care Access Combination     | 0.731*<br>(0.325)  | 1.449**<br>(0.283) | 0.278**<br>(0.082)  | 0.638**<br>(0.135)  | 0.394**<br>(0.079) |

Coefficients are from models using the same sample and controls as Table 2, separately by maternal race/ethnicity (models 1-3) and education (models 4-5). Post-expansion coefficients are shown for the combination of reforms to increase access to Medicaid (all 5 reforms) or to increase access to prenatal care (all 3 reforms).

Robust standard errors in parentheses. \*\* p<0.01, \* p<0.05, + p<0.1

Shaded coefficients indicate significant differences between coefficients by race (Black-White), ethnicity (Latina-White), or education (no college-college) (p<0.05; Clogg et al. 1995).



Table A6: Coefficients for Medicaid Expansion and Reform Combinations – Controlling for Pretrends

Panel A: Predicting Infant Health

| VARIABLES                  | (1)<br>Birth Weight  | (2)<br>Gestational Length | (3)<br>Low Birth Weight | (4)<br>Preterm Birth |
|----------------------------|----------------------|---------------------------|-------------------------|----------------------|
| Post Expansion             | 20.861**<br>(6.049)  | 0.098**<br>(0.037)        | -0.007**<br>(0.002)     | -0.012**<br>(0.003)  |
| Post*Medicaid Access Combo | -42.021*<br>(16.582) | 0.113+<br>(0.059)         | 0.002<br>(0.004)        | -0.013**<br>(0.003)  |
| Post*Care Access Combo     | 21.616**<br>(7.944)  | 0.033<br>(0.044)          | -0.007*<br>(0.003)      | -0.009*<br>(0.004)   |
| Observations               | 2,161,746            | 2,161,746                 | 2,161,746               | 2,161,746            |
| R-squared                  | 0.028                | 0.004                     | 0.003                   | 0.005                |
| State & Year Fixed Effects | Y                    | Y                         | Y                       | Y                    |
| Time-Varying Controls      | Y                    | Y                         | Y                       | Y                    |

Panel B: Predicting Prenatal Care

| VARIABLES                  | (1)<br>Any Prenatal Care | (2)<br>1 <sup>st</sup> Trimester Care | (3)<br>Prenatal Visits | (4)<br>Prenatal Care Length |
|----------------------------|--------------------------|---------------------------------------|------------------------|-----------------------------|
| Post Expansion             | -0.001<br>(0.003)        | -0.005<br>(0.011)                     | 0.020<br>(0.131)       | -0.029<br>(0.045)           |
| Post*Medicaid Access Combo | -0.008*<br>(0.003)       | -0.022*<br>(0.011)                    | -0.216+<br>(0.111)     | -0.156**<br>(0.044)         |
| Post*Care Access Combo     | 0.005<br>(0.005)         | 0.026*<br>(0.012)                     | 0.231<br>(0.157)       | 0.148*<br>(0.071)           |
| Observations               | 2,161,746                | 2,161,746                             | 2,136,940              | 2,161,746                   |
| R-squared                  | 0.009                    | 0.058                                 | 0.039                  | 0.059                       |
| State & Year Fixed Effects | Y                        | Y                                     | Y                      | Y                           |
| Time-Varying Controls      | Y                        | Y                                     | Y                      | Y                           |

NVSS birth data 1985-1994: 10% annual random sample of singleton births with infant health, prenatal care, and maternal education and race information, limited to births within 48 months of Medicaid expansion in maternal state of residence. Coefficients are from models controlling for maternal age, infant sex, state unemployment rate, poverty rate, AFDC benefit for a family of 4, an indicator for Democrat governor, percent Black, percent Latinx, (log) population, individual reforms, state and year fixed effects, and dependent variable pretrends for states that implemented the reform combinations.

Robust standard errors in parentheses. \*\* p<0.01, \* p<0.05, + p<0.1

Table A7: Coefficients for Medicaid Expansion and Reform Combinations – Using Alternative Medicaid and Care Access Combinations (implemented by 12 and 9 states, respectively)

Panel A: Predicting Infant Health

| VARIABLES                  | (1)<br>Birth Weight | (2)<br>Gestational Length | (3)<br>Low Birth Weight | (4)<br>Preterm Birth |
|----------------------------|---------------------|---------------------------|-------------------------|----------------------|
| Post Expansion             | 22.900**<br>(6.924) | 0.106**<br>(0.032)        | -0.008**<br>(0.002)     | -0.011**<br>(0.003)  |
| Post*Medicaid Access Combo | 15.133*<br>(7.405)  | 0.092**<br>(0.032)        | -0.003<br>(0.002)       | -0.002<br>(0.003)    |
| Post*Care Access Combo     | 14.671*<br>(6.306)  | 0.021<br>(0.032)          | -0.004*<br>(0.002)      | -0.001<br>(0.002)    |
| Observations               | 2,161,746           | 2,161,746                 | 2,161,746               | 2,161,746            |
| R-squared                  | 0.028               | 0.004                     | 0.003                   | 0.005                |
| State & Year Fixed Effects | Y                   | Y                         | Y                       | Y                    |
| Time-Varying Controls      | Y                   | Y                         | Y                       | Y                    |

Panel B: Predicting Prenatal Care

| VARIABLES                  | (1)<br>Any Prenatal Care | (2)<br>1 <sup>st</sup> Trimester Care | (3)<br>Prenatal Visits | (4)<br>Prenatal Care Length |
|----------------------------|--------------------------|---------------------------------------|------------------------|-----------------------------|
| Post Expansion             | 0.003<br>(0.003)         | -0.004<br>(0.012)                     | 0.075<br>(0.146)       | 0.003<br>(0.054)            |
| Post*Medicaid Access Combo | 0.005<br>(0.004)         | 0.012<br>(0.012)                      | 0.128<br>(0.132)       | 0.075<br>(0.065)            |
| Post*Care Access Combo     | 0.009*<br>(0.004)        | 0.010<br>(0.010)                      | 0.218*<br>(0.097)      | 0.100+<br>(0.057)           |
| Observations               | 2,161,746                | 2,161,746                             | 2,136,940              | 2,161,746                   |
| R-squared                  | 0.009                    | 0.058                                 | 0.039                  | 0.059                       |
| State & Year Fixed Effects | Y                        | Y                                     | Y                      | Y                           |
| Time-Varying Controls      | Y                        | Y                                     | Y                      | Y                           |

NVSS birth data 1985-1994: 10% annual random sample of singleton births with infant health, prenatal care, and maternal education and race information, limited to births within 48 months of Medicaid expansion in maternal state of residence. Coefficients are from models controlling for maternal age, infant sex, state unemployment rate, poverty rate, AFDC benefit for a family of 4, an indicator for Democrat governor, percent Black, percent Latinx, (log) population, individual reforms, and state and year fixed effects.

Robust standard errors in parentheses. \*\* p<0.01, \* p<0.05, + p<0.1

Table A8: Coefficients for Medicaid Expansion and Reform Combinations – Using Alternative Medicaid and Care Access Combinations (implemented by 16 and 9 states, respectively)

Panel A: Predicting Infant Health

| VARIABLES                  | (1)<br>Birth Weight | (2)<br>Gestational Length | (3)<br>Low Birth Weight | (4)<br>Preterm Birth |
|----------------------------|---------------------|---------------------------|-------------------------|----------------------|
| Post Expansion             | 25.863*<br>(9.958)  | 0.150**<br>(0.049)        | -0.008*<br>(0.003)      | -0.014**<br>(0.005)  |
| Post*Medicaid Access Combo | 15.118<br>(11.337)  | 0.134**<br>(0.048)        | -0.003<br>(0.003)       | -0.007<br>(0.005)    |
| Post*Care Access Combo     | 13.490*<br>(6.137)  | 0.017<br>(0.030)          | -0.004*<br>(0.002)      | -0.001<br>(0.002)    |
| Observations               | 2,161,746           | 2,161,746                 | 2,161,746               | 2,161,746            |
| R-squared                  | 0.028               | 0.004                     | 0.003                   | 0.005                |
| State & Year Fixed Effects | Y                   | Y                         | Y                       | Y                    |
| Time-Varying Controls      | Y                   | Y                         | Y                       | Y                    |

Panel B: Predicting Prenatal Care

| VARIABLES                  | (1)<br>Any Prenatal Care | (2)<br>1 <sup>st</sup> Trimester Care | (3)<br>Prenatal Visits | (4)<br>Prenatal Care Length |
|----------------------------|--------------------------|---------------------------------------|------------------------|-----------------------------|
| Post Expansion             | 0.000<br>(0.003)         | 0.010<br>(0.014)                      | 0.172<br>(0.175)       | 0.014<br>(0.061)            |
| Post*Medicaid Access Combo | -0.001<br>(0.004)        | 0.031+<br>(0.017)                     | 0.246<br>(0.181)       | 0.069<br>(0.072)            |
| Post*Care Access Combo     | 0.009*<br>(0.004)        | 0.011<br>(0.009)                      | 0.214*<br>(0.090)      | 0.094+<br>(0.053)           |
| Observations               | 2,161,746                | 2,161,746                             | 2,136,940              | 2,161,746                   |
| R-squared                  | 0.009                    | 0.058                                 | 0.039                  | 0.059                       |
| State & Year Fixed Effects | Y                        | Y                                     | Y                      | Y                           |
| Time-Varying Controls      | Y                        | Y                                     | Y                      | Y                           |

NVSS birth data 1985-1994: 10% annual random sample of singleton births with infant health, prenatal care, and maternal education and race information, limited to births within 48 months of Medicaid expansion in maternal state of residence. Coefficients are from models controlling for maternal age, infant sex, state unemployment rate, poverty rate, AFDC benefit for a family of 4, an indicator for Democrat governor, percent Black, percent Latinx, (log) population, individual reforms, and state and year fixed effects.

Robust standard errors in parentheses. \*\* p<0.01, \* p<0.05, + p<0.1

Figure A1: Doubly Robust Difference in Differences Analyses: Coefficients Predicting State Medicaid Recipients per Residents in Poverty

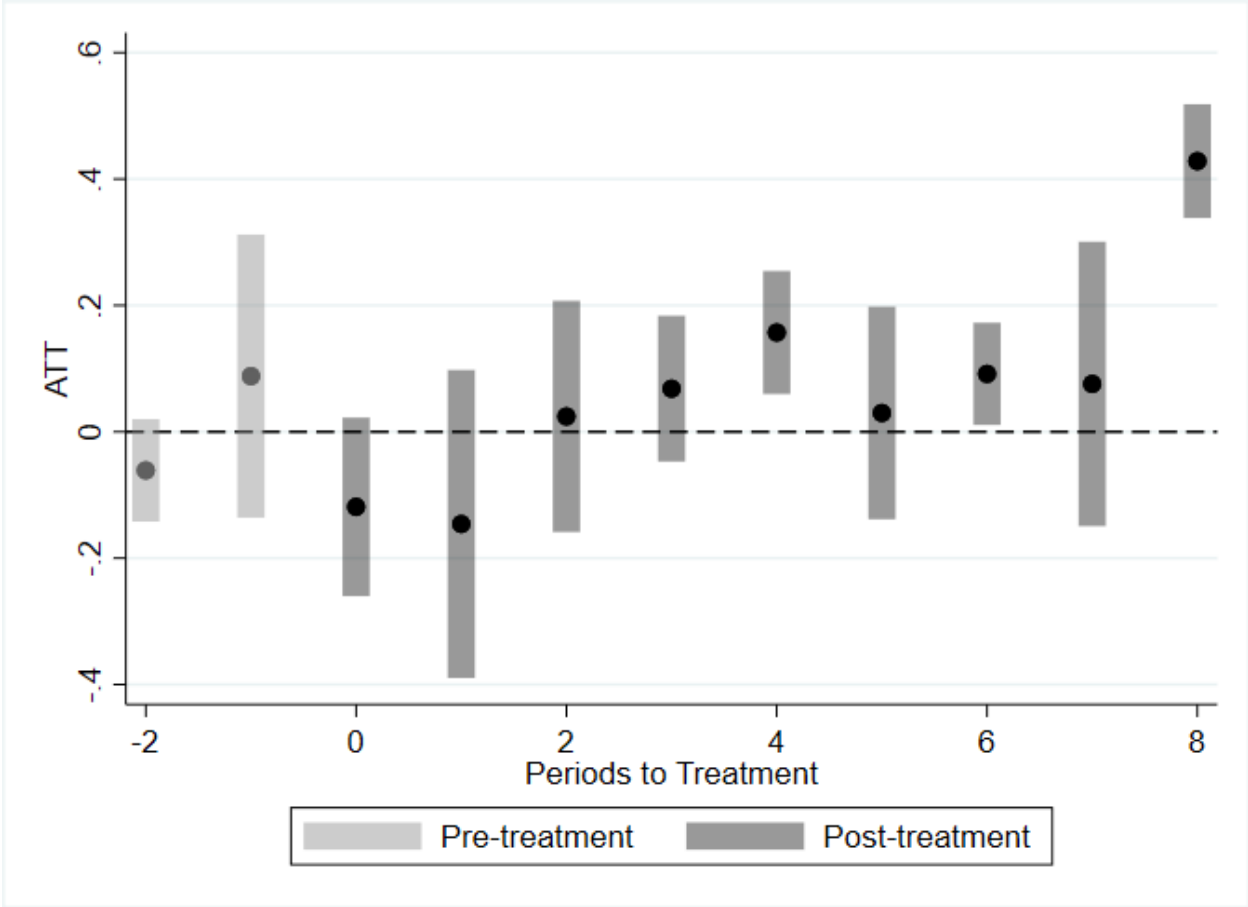

Estimates by year from Medicaid expansion from doubly robust difference-in-differences analyses using csdid in Stata (Callaway and Sant'Anna 2020; Sant'Anna and Zhao 2020).

Figure A2: Low Birth Weight Trends before Medicaid Expansion by State Reforms  
A. Reforms to Improve Access to Medicaid

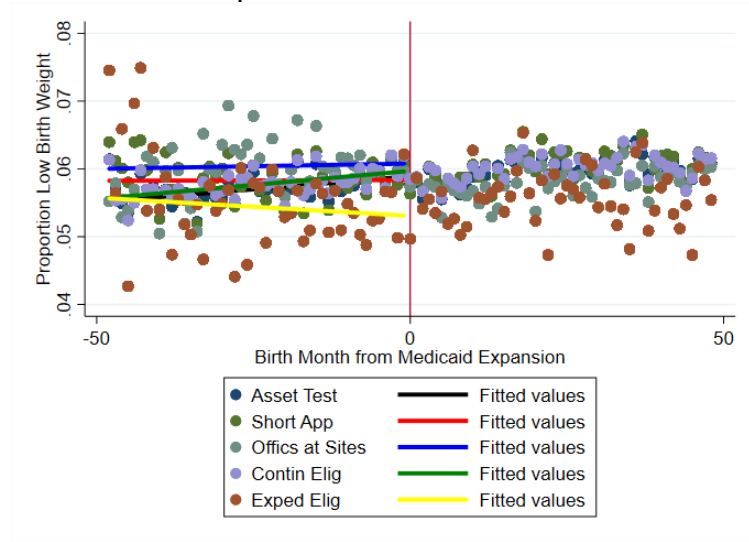

B. Reforms to Improve Access to Prenatal Care

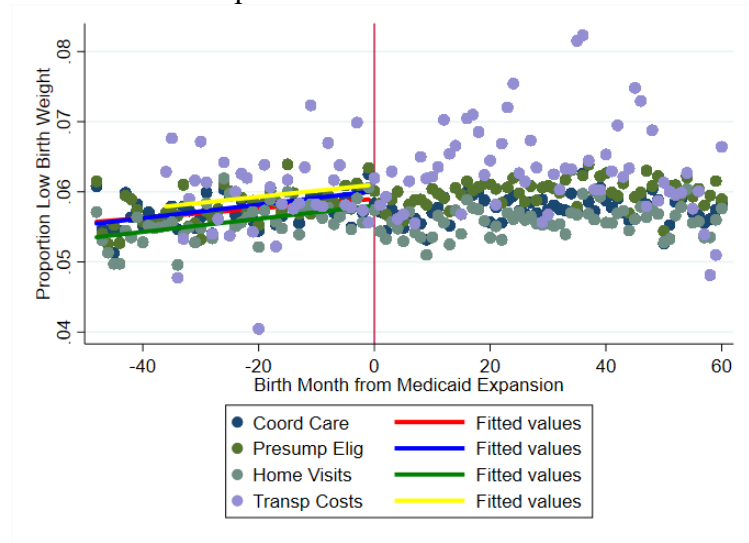

Supplement: Rauscher_and_Burns_online_appendix.pdf [file Rauscher_and_Burns_online_appendix.pdf]
